# Supplementary material for: Circular RNA 0000096 affects cell growth and migration in gastric cancer
Source: PubMed Central journal article supplement — Br J Cancer. 2017 Jan 12;116(5):626–33. doi: 10.1038/bjc.2016.451 (PMC5344286; doi:10.1038/bjc.2016.451), 2017-01-12
Supplement: bjc2016451x1.pdf [file bjc2016451x1.pdf]

Supplementary information

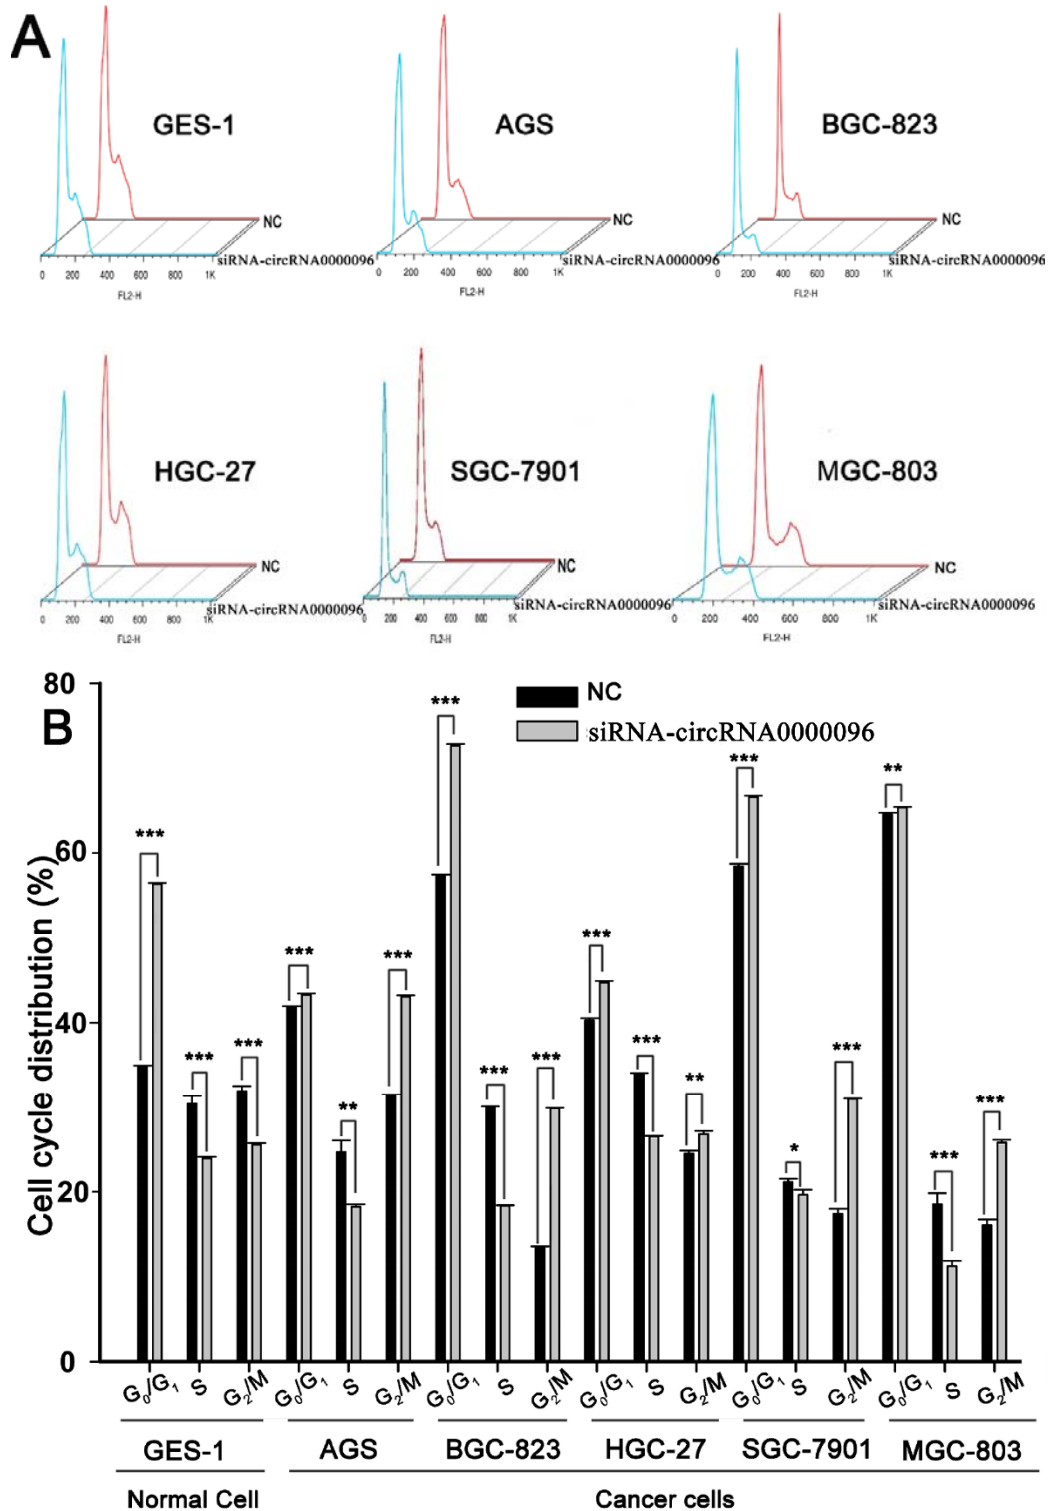

**Supplementary Figure 1.** Cell cycle distributions in a human normal gastric epithelial cell line and human gastric cancer cell lines following by knockdown of hsa\_circ\_0000096.

(A) Representative flow cytometry results. (B) Data are presented as mean  $\pm$  SD,  $n=3$ . NC, negative control. \* $p < 0.05$ , \*\* $p < 0.01$ , \*\*\* $p < 0.001$ .

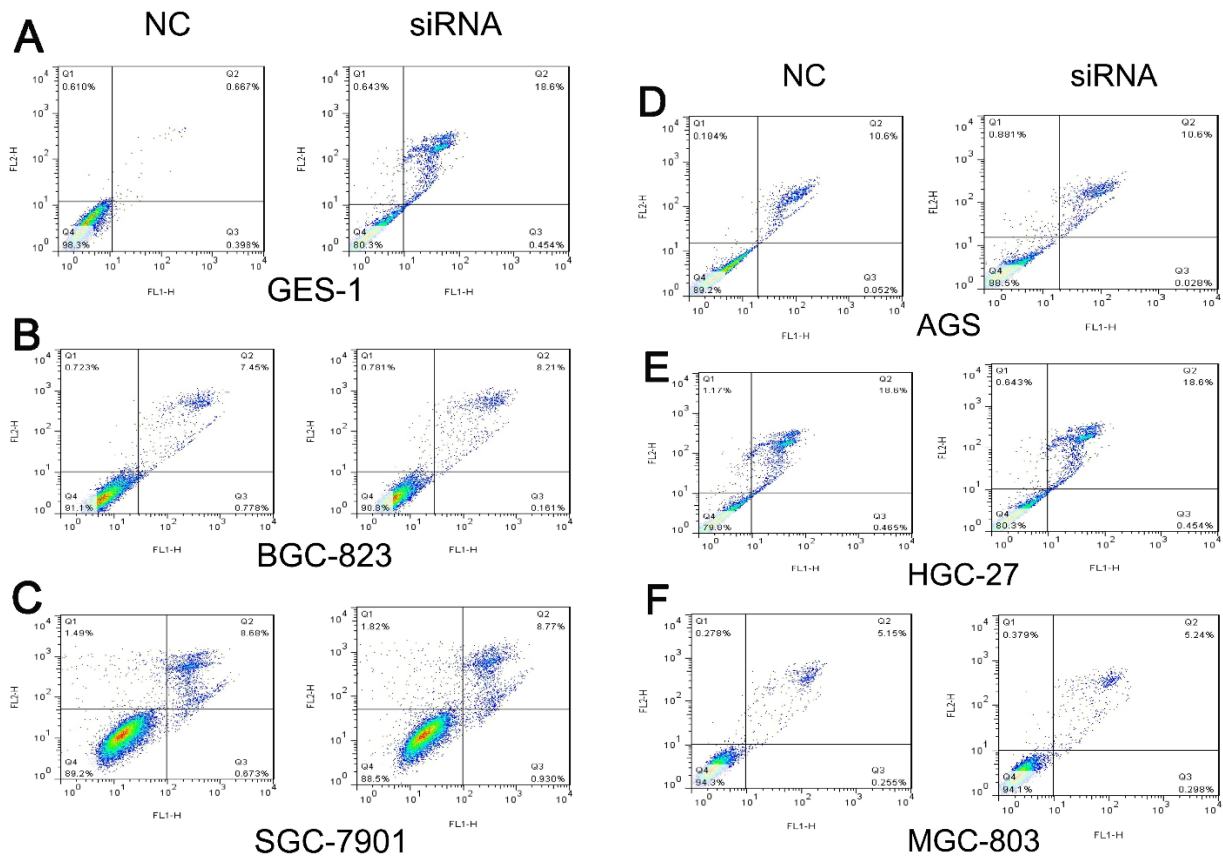

**Supplementary Figure 2.** Cell apoptosis in a human normal gastric epithelial cell line (A) and human gastric cancer cell lines BGC-823 (B), SGC-7901 (C), AGS (D), HGC-27 (E), and MGC-803 (F) following by knockdown of hsa\_circ\_0000096.

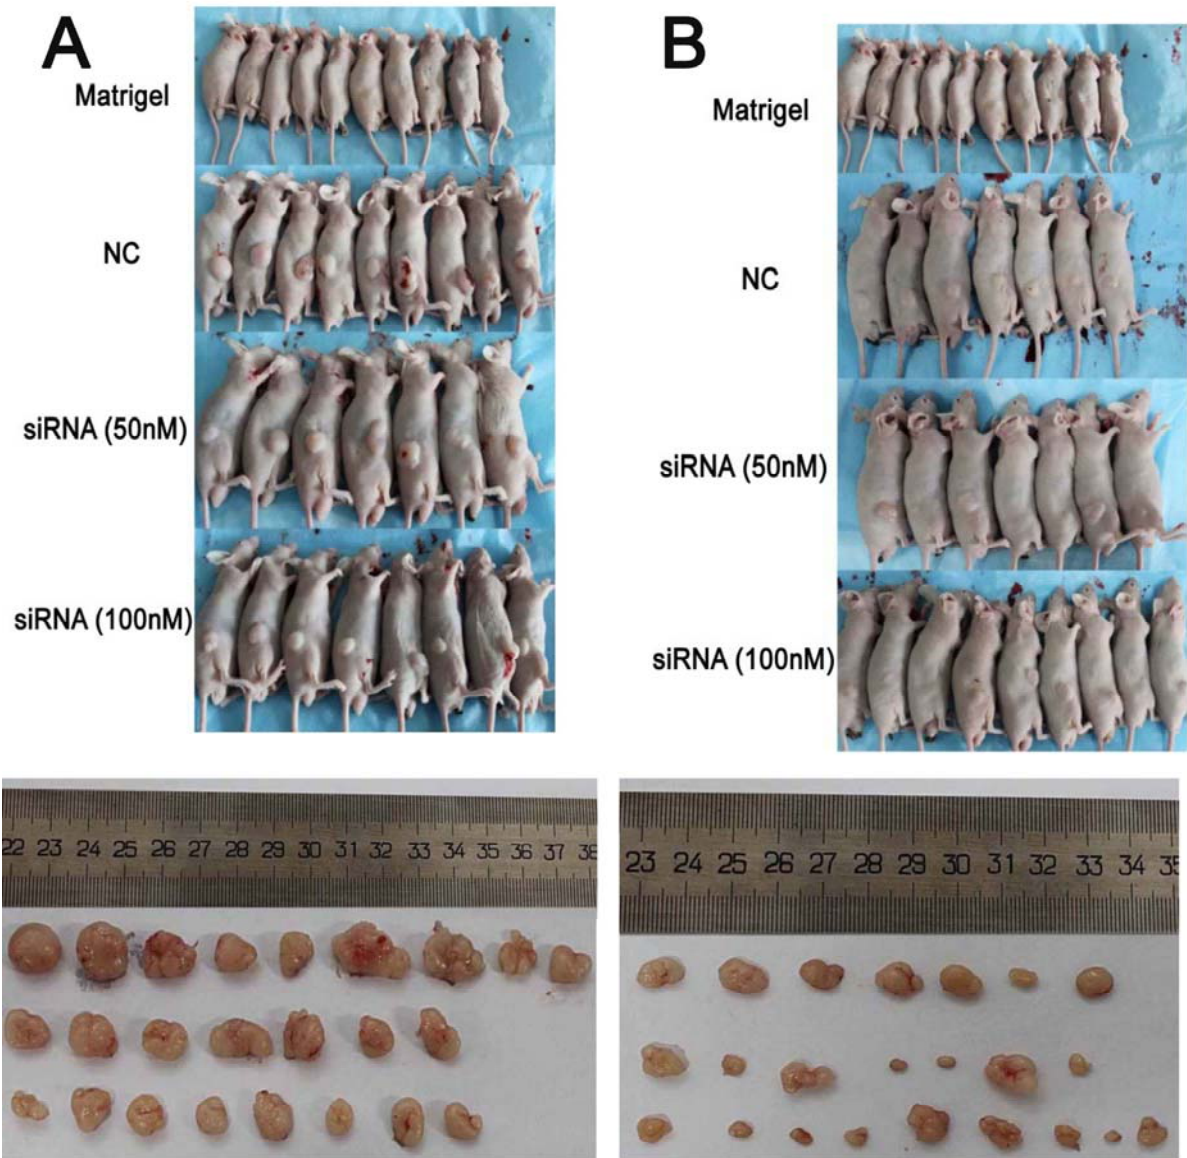

**Supplementary Figure 3.** The effect of knockdown of has\_circ\_0000096 on tumor growth of human gastric cancer cell lines BGC-823 (A) and MGC-803 (B)

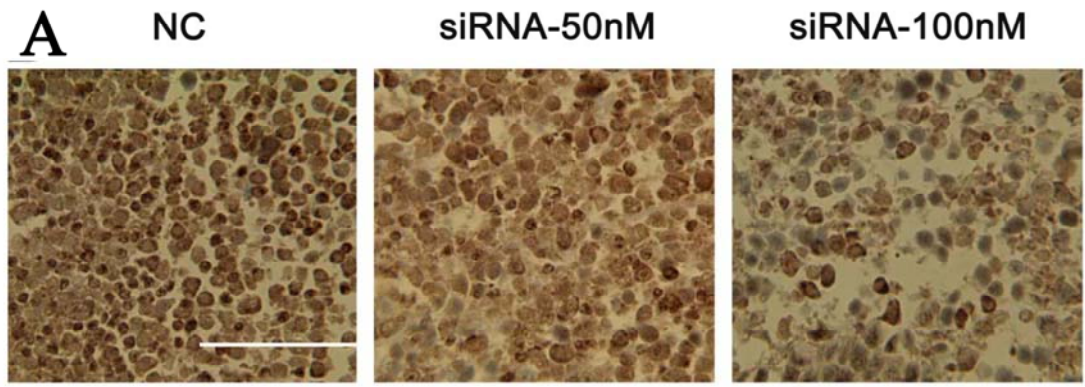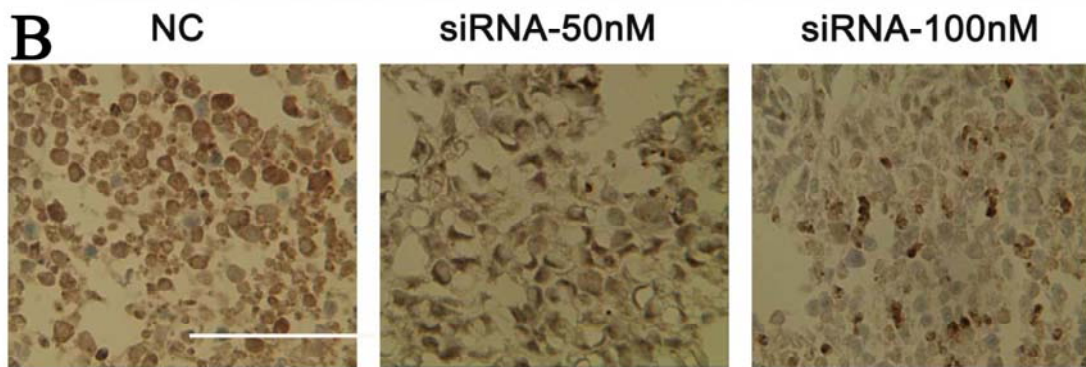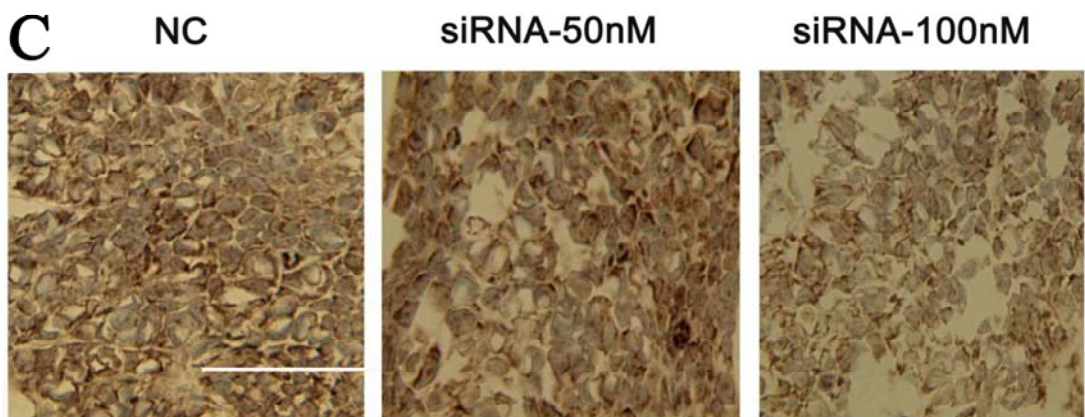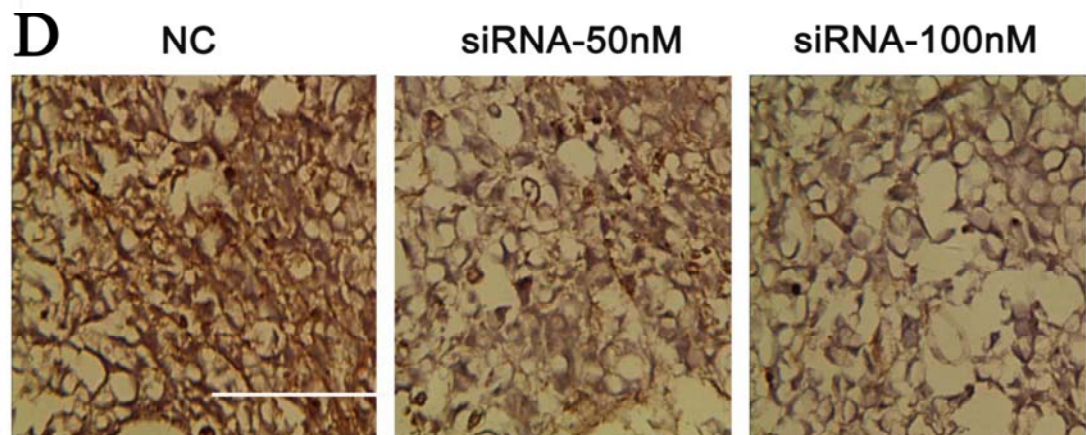

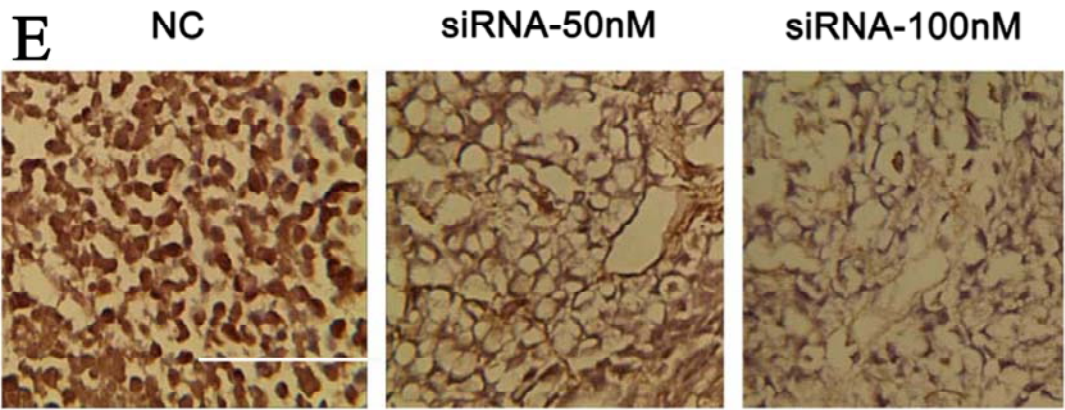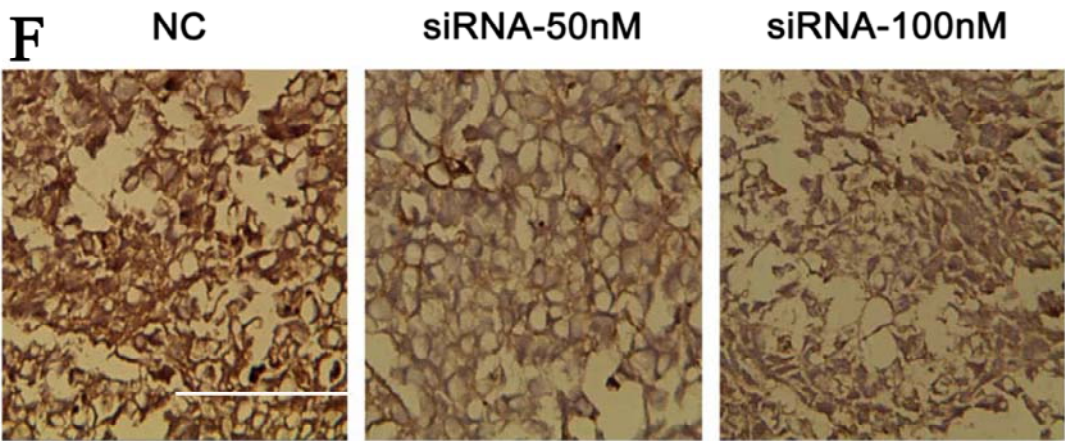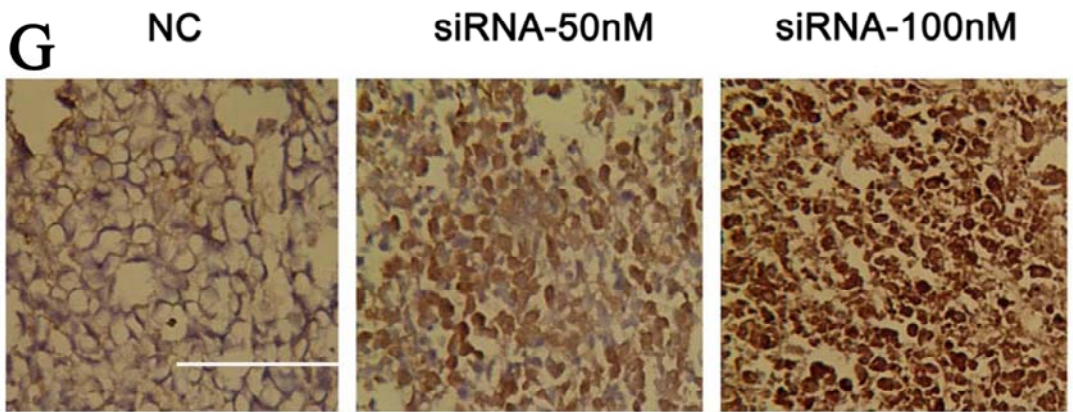

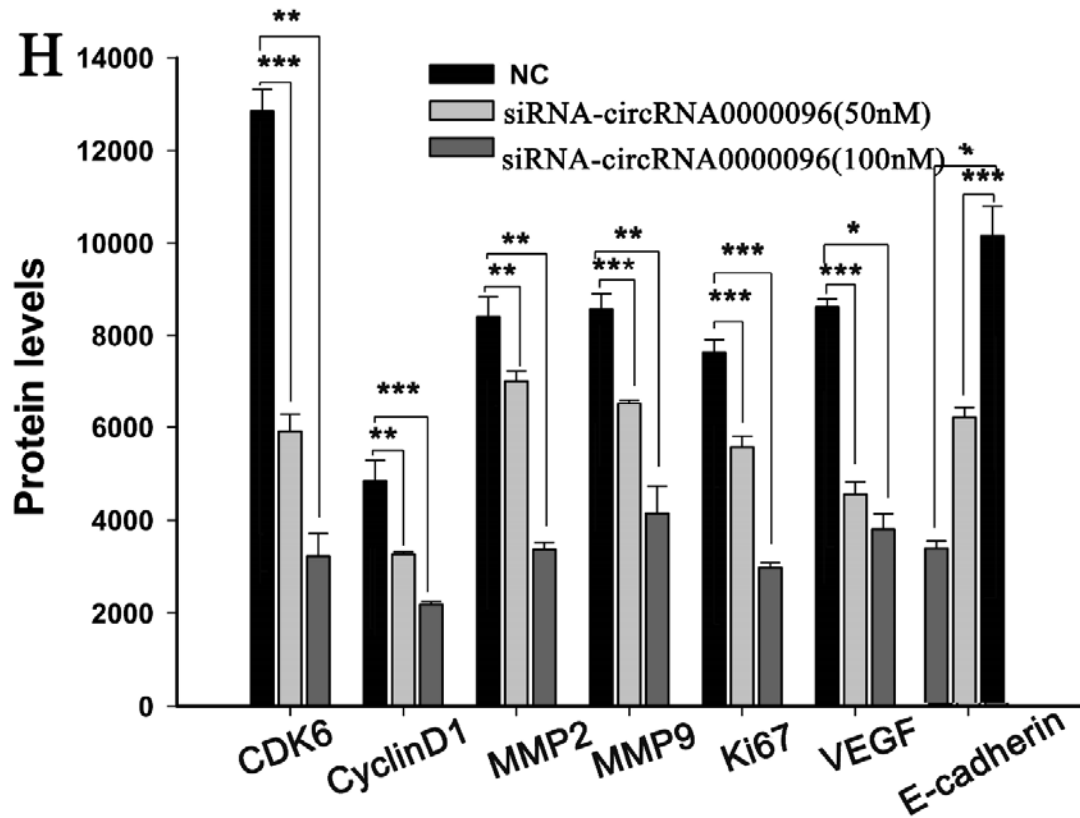

**Supplementary Figure 4.** The result of protein levels in xenografts nude mice models.

CDK6 (A), cyclin D1 (B), MMP-2 (C), MMP-9 (D), Ki67 (E), VEGF (F), and E-cadherin (G).

The plotting scale is 500 $\mu$ m. (H) Data are presented as mean  $\pm$  SD,  $n=3$ . NC, negative control.

\* $p<0.05$ , \*\* $p<0.01$ , \*\*\* $p<0.001$ .

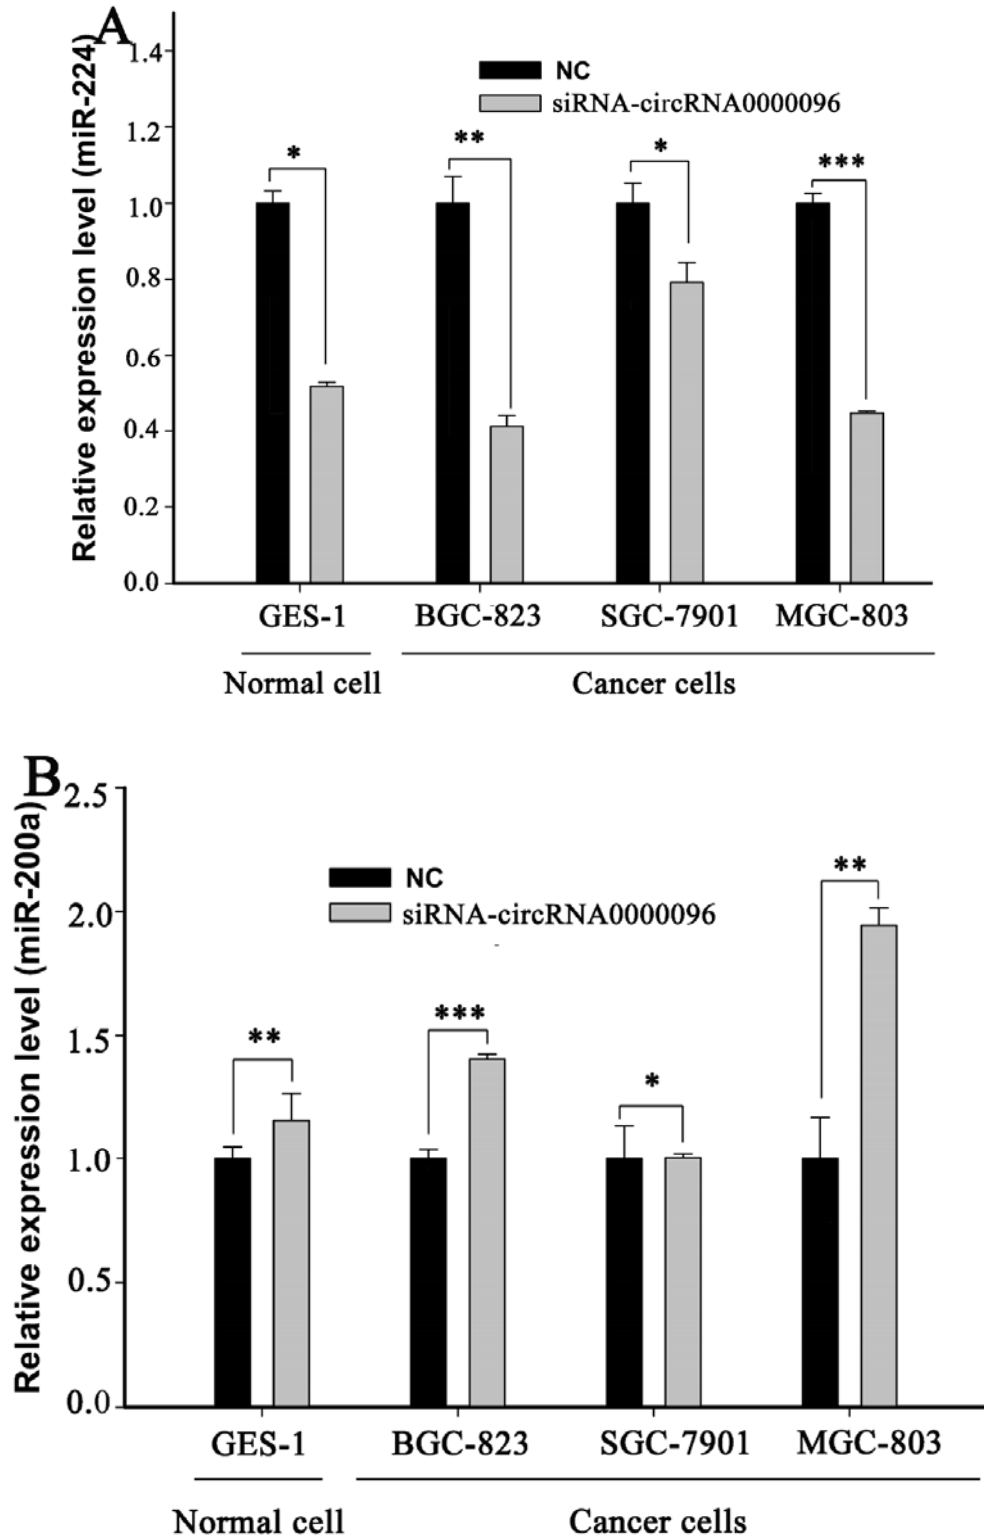

**Supplementary Figure 5.** The expression level of miR-224 (A) and miR-200a (B) in human normal gastric epithelial cell line and human gastric cancer cell lines following by knockdown of hsa\_circ\_0000096. Data are presented as mean  $\pm$  SD,  $n=3$ . NC, negative control. \* $p<0.05$ , \*\* $p<0.01$ , \*\*\* $p<0.001$ .

**Supplementary Table 1. The relationship of hsa\_circ\_0000096 expression levels ( $\Delta C_t$ ) in cancer tissues with clinicopathological factors of patients with gastric cancer**

| Characteristics      | No. of patients (%) | Mean $\pm$ SD     | <i>p</i> value |
|----------------------|---------------------|-------------------|----------------|
| Age (year)           |                     |                   |                |
| $\geq 60$            | 59 (61.5)           | 13.20 $\pm$ 1.36  | 0.124          |
| $< 60$               | 37 (38.5)           | 12.73 $\pm$ 1.41  |                |
| Gender               |                     |                   |                |
| Male                 | 70 (72.9)           | 13.21 $\pm$ 1.40  | 0.001          |
| Female               | 26 (27.1)           | 12.28 $\pm$ 1.21  |                |
| Diameter (cm)        |                     |                   |                |
| $\geq 5$             | 53 (55.2)           | 13.05 $\pm$ 1.52  | 0.315          |
| $< 5$                | 43 (44.8)           | 12.79 $\pm$ 1.26  |                |
| CA19-9               |                     |                   |                |
| Positive             | 55 (57.3)           | 13.04 $\pm$ 1.51  | 0.497          |
| Negative             | 41 (42.7)           | 12.80 $\pm$ 1.26  |                |
| CEA                  |                     |                   |                |
| Positive             | 88 (91.7)           | 12.97 $\pm$ 1.42  | 0.327          |
| Negative             | 8 (8.3)             | 12.54 $\pm$ 1.32  |                |
| Differentiation      |                     |                   |                |
| Well                 | 6 (6.4)             | 12.83 $\pm$ 1.06  | 0.441          |
| Moderate             | 47 (50.0)           | 13.06 $\pm$ 1.42  |                |
| Poor                 | 41 (43.6)           | 12.80 $\pm$ 1.42  |                |
| Lymphatic metastasis |                     |                   |                |
| N0                   | 34 (33.3)           | 13.27 $\pm$ 1.25  | 0.201          |
| N1                   | 13 (13.5)           | 12.70 $\pm$ 1.24  |                |
| N2                   | 15 (13.6)           | 12.97 $\pm$ 1.62  |                |
| N3                   | 34 (35.4)           | 12.65 $\pm$ 1.53  |                |
| Distal metastasis    |                     |                   |                |
| M0                   | 88 (91.7)           | 13.00 $\pm$ 1.42  | 0.153          |
| M1                   | 8 (8.3)             | 12.33 $\pm$ 1.16  |                |
| Invasion             |                     |                   |                |
| Tis & T1-T3          | 36 (37.5)           | 13.30 $\pm$ 1.29  | 0.046          |
| T4                   | 60 (64.5)           | 12.73 $\pm$ 1.44  |                |
| TNM stage            |                     |                   |                |
| 0 & I & II           | 38 (39.6)           | 13.33 $\pm$ 1.30  | 0.024          |
| III & IV             | 58 (60.4)           | 12.63 $\pm$ 1.142 |                |
